# Supplementary material
Source: publisher site journal article supplement (https://www.dovepress.com/article/355468)
Supplement: Supplementary file 1 [file get_supplementary_file.php]

# Supplemental Figure 1: 353 Unique Free Texts Descriptions of 10% Dextrose Solution

## Ten Percent Dextrose

|                                   |                                      |                                 |                                      |                                   |
|-----------------------------------|--------------------------------------|---------------------------------|--------------------------------------|-----------------------------------|
| #2 D10W/ heparin                  | D10 0.45                             | D10 w/hep                       | D10+NaCl+Hep                         | D10W+Lytes+Hep                    |
| D 10                              | D10 Hep                              | D10 w/heparin                   | D10+NaCl+hep                         | D10W+NA+HEP                       |
| D 10 + Hep                        | D10 Heparin                          | D10 w/lytes                     | D10+hep                              | D10W+NaCl                         |
| D 10 + Lytes                      | D10 LYTRES                           | D10 w/lytes w/hep               | D10+hep (UVC 1)                      | D10W+NaCl+Heparin                 |
| D 10 + NaCl                       | D10 Lytes                            | D10 water                       | D10+hep UVC 1                        | D10W+hep                          |
| D 10 + hep                        | D10 Lytes + Hep                      | D10 water + heparin             | D10+hep UVC2                         | D10W+hep+ sodium chloride         |
| D 10 + lytes                      | D10 Lytes + Heparin                  | D10 with Heparin                | D10+heparin                          | D10W+hep+lytes                    |
| D 10 Lytes                        | D10 Lytes + Heparin                  | D10 with ca glu and hep         | D10+heparin 1:1                      | D10W+heparin                      |
| D 10 W                            | D10 Lytes + Hep                      | D10 with hep                    | D10+lytes                            | D10W+lytes +heparin               |
| D 10 W + hep                      | D10 Lytes w/ hep                     | D10 with lytes                  | D10+lytes +heparin                   | D10W+lytes+hep                    |
| D 10 W w/heparin                  | D10 Lytes w/hep                      | D10%                            | D10+lytes+hep                        | D10W, 0.2ns & 5 meq KCl & hep.    |
| D 10 lytes                        | D10 Lytes+Hep                        | D10% + 0.2 NaCl                 | D10+lytes+heparin                    | D10W, NaCl                        |
| D 10 lytes + Hep                  | D10 Lytes+Hep (UVC 2)                | D10% + Heparin                  | D10-Lytes                            | D10W, lytes                       |
| D 10 lytes + hep                  | D10 NaCl 0.2% + 5 mEq Kcl            | D10% + Lytes                    | D10.2 NaCL w/hep                     | D10W,0.2 NS & 5 meq KCl           |
| D 10 lytes W hep                  | D10 NaCl 0.2% + 5 mEq Kcl + hep      | D10% + hep1:1                   | D10.2 w/hep                          | D10W,0.2NS & 5 meq KCl            |
| D 10 w heparin                    | D10 NaCl 0.22% + 5 mEq KCL + heparin | D10% + lytes                    | D10.2+5KCL                           | D10W/ LYTRES AND HEPARIN          |
| D 10 w lytes + heparin            | D10 NaCl w/ hep                      | D10% + Hep                      | D10.2NS w/2.5meqKCL and heparin      | D10W/ hep                         |
| D 10 w lytes+ heparin             | D10 Nacl 0.2% + 5 mEq Kcl + heparin  | D10% +Hep                       | D10.2NS+5KCL                         | D10W/lytes                        |
| D 10 w/ 0.225 sodium              | D10 Nacl + 5 mEq KCL + Hep           | D10% .2NS and 5 meq KCL         | D10.2NS+5kcl                         | D10W0.2NS 5meq KCl& Hep           |
| D 10 w/ lytes with heparin        | D10 Nacl 0.2% + Kcl 5 mEq            | D10% Lytes + heparin            | D10.2NS+5meq KCL+ heparin            | D10W0.2NaCl+ 5mEqKCl+1U/mLHeparin |
| D 10 w/calcium and heparin        | D10 Nacl 0.22% +5 mEq Kcl + hep      | D10% Water                      | D10.2NS+Kcl                          | D10W0.2NaCl+5mEqKCl               |
| D 10 w/lytes                      | D10 Sodium +heparin                  | D10% lytes + heparin            | D10.2ns+5kcl                         | D10Water+Hep                      |
| D 10 w/lytes and heparin          | D10 W                                | D10% w/ lytes.                  | D10/.2NS+5KCL                        | D10lytes                          |
| D 10 with Sodium Chloride         | D10 W + NA acetate                   | D10% water                      | D10/Heparin                          | D10lytes + hep                    |
| D 10% w Lytes                     | D10 W + hep                          | D10% with Hep                   | D10/Lytes                            | D10lytes + heparin                |
| D 10W                             | D10 W + heparin                      | D10% with Lytes                 | D10/Lytes + Heparin                  | D10lytes +hep                     |
| D 10w/hep                         | D10 W +.45 NA Acetate                | D10% with Lytes & Hep1:1        | D10/heparin                          | D10lytes and Hep                  |
| D 10w/hep.                        | D10 W +.45 NA acetate                | D10% with Lytes and Hep1:1      | D10/lytes                            | D10lytes with heparin             |
| D 10w/heparin                     | D10 W +NA acetate                    | D10% with NaCl.2%               | D10/lytes/hep                        | D10lytes+Hep                      |
| D10                               | D10 W c/Na Acetate                   | D10% with hep                   | D10/lytes/heparin                    | D10lytes+Heparin                  |
| D10 + H2O + NaCl 0.225% + heparin | D10 W lytes                          | D10%+Hep                        | D10L w/hep.                          | D10lytes+hep                      |
| D10 + Hep                         | D10 W+. 45 NA Acetate                | D10%+Lytes                      | D10LYTES                             | D10lytes/hep                      |
| D10 + Hep (UVC #1)                | D10 W/ LYTRES                        | D10%+Sodium Acetate+Hep(UVC #1) | D10Lytes                             | D10w                              |
| D10 + Hep (UVC #2)                | D10 W/ LYTRES + HEP                  | D10%/Heparin                    | D10Lytes w/heparin                   | D10w & Hep                        |
| D10 + Hep (UVC 2)                 | D10 W/ LYTRES AND HEP                | D10%NaCl+Heparin                | D10Lytes with hep                    | D10w + NaCl 0.225% + heparin      |
| D10 + Hep 1:1                     | D10 Water                            | D10%W                           | D10Lytes+Hep                         | D10w + hep                        |
| D10 + Hep w/ lytes                | D10 acetate c heparin                | D10%W with Heparin              | D10Lytes+hep                         | D10w +hep                         |
| D10 + Heparin                     | D10 acetate withheparin              | D10%Water +heparin              | D10W                                 | D10w hep                          |
| D10 + Lytes                       | D10 hep                              | D10%w/lytes.                    | D10W + hep                           | D10w +hep                         |
| D10 + Lytes & Hep1:1              | D10 heparin                          | D10+ 0.45 Nacl                  | D10W + Hep                           | D10w w/lytes                      |
| D10 + Lytes + Heparin             | D10 in water + hep                   | D10+ Hep                        | D10W + Heparin                       | D10w+ HEP                         |
| D10 + Lytes + hep                 | D10 in water w/ hep                  | D10+ Hep (UVC #2)               | D10W + Na + Hep                      | D10w+hep                          |
| D10 + NA ACE + heparin            | D10 lytes                            | D10+ Lytes                      | D10W + NaCl 0.225% + heparin         | D10w/hep                          |
| D10 + NaCl 0.22% +5 mEq KCl+hep   | D10 lytes + Ca+hep                   | D10+ hep                        | D10W + NaCl 0.225% + heparin         | D10w/lytes                        |
| D10 + hep                         | D10 lytes + Hep                      | D10+ heparin                    | D10W + hep                           | D10w/lytes+hep1:1                 |
| D10 + hep UVC #2                  | D10 lytes + heparin                  | D10+ lytes                      | D10W                                 | D10water                          |
| D10 + heparin                     | D10 lytes + hep                      | D10+ lytes+hep                  | D10Lytes w/heparin                   | D10water+hep                      |
| D10 + heparin-UVC 2               | D10 lytes +heparin                   | D10+.2 NaCl                     | D10Lytes with hep                    | d 10 W + NaCl                     |
| D10 + lytes                       | D10 lytes +hep                       | D10+.45 NA ACETATE              | D10Lytes+hep                         | d 10 w                            |
| D10 + lytes + hep                 | D10 lytes and hep                    | D10+.45NS+hep                   | D10W +hep                            | d 10 with hep                     |
| D10 + lytes + heparin             | D10 lytes hep                        | D10+.45NaCl+K                   | D10W +hep + sodium chloride          | d 10 with lytes                   |
| D10 +0.2NaCl w/hep                | D10 lytes w/ hep                     | D10+.9NS                        | D10W +lytes                          | d10                               |
| D10 +Hep                          | D10 lytes w/hep                      | D10+0.2 NS                      | D10W hep                             | d10 + hep                         |
| D10 +Hep                          | D10 lytes/heparin                    | D10+0.2 NaCl w/hep              | D10W lytes                           | d10 + lytes                       |
| D10 +Lytes                        | D10 lytes with hep                   | D10+0.2NS                       | D10W lytes+hep                       | d10 hep                           |
| D10 +hep                          | D10 lytes with heparin               | D10+025Saline+lytes             | D10W w/ Na+ Acetate, KCL and heparin | d10 lytes                         |
| D10 +heparin                      | D10 lytes+CA                         | D10+Ca+hep                      | D10W w/ hep                          | d10 lytes w/hep                   |
| D10 +lytes                        | D10 lytes+hep                        | D10+HEP                         | D10W w/heparin                       | d10 lytes with hep                |
| D10 +lytes + hep                  | D10 lytes+heparin                    | D10+Hep                         | D10W +heparin                        | d10 with lytes                    |
| D10 +lytes+hep                    | D10 lytes.                           | D10+Hep (UVC#1)                 | D10W + lytes                         | d10%+lytes                        |
| D10 ,0.2NS & 5 meq KClw/heparin   | D10 lytes/hep                        | D10+Heparin                     | D10W + hep                           | d10+ na acetate+heparin           |
| D10 .9NS lytes + hep              | D10 sodium cl with heparin           | D10+LYTES                       | D10W + hep                           | d10+Lytes                         |
| D10 /Lytes + Heparin              | D10 w lytes                          | D10+Lytes                       | D10W + hep                           | d10+heparin                       |
| D10 0.2 NS                        | D10 w/ 0.45NS and KCl                | D10+Lytes+ hep                  | D10W+ heparin                        | d10+lytes                         |
| D10 0.2NS+5meq KCl + heparin      | D10 w/ Hep                           | D10+Lytes+Hep                   | D10W+0.2NS                           | d10+na                            |
|                                   | D10 w/ Heparin                       | D10+Lytes+Heparin               | D10W+0.2NaCl+5mEqKCl                 | d10+na acetate                    |
|                                   | D10 w/ hep                           | D10+NACL                        | D10W+HEP                             | d10+nacl                          |
|                                   | D10 w/ heparin                       | D10+Na Acetate +Hep             | D10W+Hep                             | d10W                              |
|                                   | D10 w/ lytes                         | D10+Na+hep                      | D10W+Heparin                         | d10 .ytes                         |
|                                   | D10 w/ lytes +hep                    | D10+NaCl                        | D10W+Heparin 1U/mL                   | d10lytes                          |
|                                   |                                      | D10+NaCl                        | D10W+Lytes                           | d10w                              |
|                                   |                                      |                                 |                                      | d10w/lytes.                       |
